# Supplementary material for: Associations of Work-Family Conflict with Family-Specific, Work-Specific, and Well-Being-Related Variables in a Sample of Polish and Ukrainian Adults during the Second Wave of the COVID-19 Pandemic: A Cross-Sectional Study
Source: MDPI journal article supplement (doi:10.3390/ijerph191710954), 2022-09-02
Supplement: s1 [file s1]

## SUPPLEMENTARY MATERIALS

**Table S1.** Country differences in work-specific and well-being variables.

| Variable              | Poland<br><i>n</i> = 392 |           | Ukraine<br><i>n</i> = 344 |           | <i>t</i> (734)    | <i>p</i> | <i>d</i> |
|-----------------------|--------------------------|-----------|---------------------------|-----------|-------------------|----------|----------|
|                       | <i>M</i>                 | <i>SD</i> | <i>M</i>                  | <i>SD</i> |                   |          |          |
| WFC                   | 26.88                    | 8.95      | 27.08                     | 9.07      | −0.30             | 0.763    | −0.02    |
| FWC                   | 25.70                    | 9.22      | 22.79                     | 8.15      | 4.54 <sub>a</sub> | < 0.001  | 0.33     |
| Remote work           | 36.59                    | 7.83      | 34.80                     | 7.22      | 2.36              | 0.019    | 0.24     |
| Time pressure actor   | 28.26                    | 10.41     | 27.05                     | 8.88      | 1.70 <sub>a</sub> | 0.091    | 0.13     |
| Time pressure partner | 19.99                    | 13.55     | 17.76                     | 12.69     | 2.29              | 0.022    | 0.17     |
| Life satisfaction     | 22.55                    | 6.52      | 23.28                     | 6.01      | −1.58             | 0.115    | −0.12    |
| Physical health       | 5.33                     | 1.52      | 5.54                      | 1.48      | −1.86             | 0.064    | −0.14    |
| Perceived stress      | 19.81                    | 6.89      | 17.79                     | 7.56      | 3.78 <sub>a</sub> | < 0.001  | 0.28     |
| Anxiety               | 8.38                     | 5.69      | 7.16                      | 5.47      | 2.97              | 0.003    | 0.22     |
| Depression            | 8.81                     | 6.97      | 7.88                      | 6.03      | 1.93 <sub>a</sub> | 0.054    | 0.14     |

Note. WFC = work-family conflict, FWC = Family-work conflict, a = Welch's *t*-test, *d* = Cohen's *d*.

**Table S2.** Gender differences in work-specific and well-being variables.

| Variable              | Men<br><i>n</i> = 250 |           | Women<br><i>n</i> = 486 |           | <i>t</i> (734)     | <i>p</i> | <i>d</i> |
|-----------------------|-----------------------|-----------|-------------------------|-----------|--------------------|----------|----------|
|                       | <i>M</i>              | <i>SD</i> | <i>M</i>                | <i>SD</i> |                    |          |          |
| WFC                   | 25.93                 | 8.33      | 27.51                   | 9.29      | −2.34 <sub>a</sub> | 0.020    | −0.18    |
| FWC                   | 23.99                 | 8.39      | 24.52                   | 9.08      | −0.77              | 0.441    | −0.06    |
| Remote work           | 34.87                 | 7.53      | 35.45                   | 7.40      | −0.75              | 0.456    | −0.08    |
| Time pressure actor   | 28.53                 | 9.88      | 27.26                   | 9.65      | 1.68               | 0.094    | 0.13     |
| Time pressure partner | 21.26                 | 14.08     | 17.75                   | 12.57     | 3.44               | < 0.001  | 0.27     |
| Life satisfaction     | 23.03                 | 6.19      | 22.82                   | 6.35      | 0.44               | 0.658    | 0.03     |
| Physical health       | 5.22                  | 1.52      | 5.53                    | 1.49      | −2.72              | 0.007    | −0.21    |
| Perceived stress      | 17.52                 | 7.15      | 19.56                   | 7.25      | −3.63              | < 0.001  | −0.28    |
| Anxiety               | 6.65                  | 5.16      | 8.41                    | 5.76      | −4.20 <sub>a</sub> | < 0.001  | −0.32    |
| Depression            | 6.98                  | 5.98      | 9.09                    | 6.73      | −4.33 <sub>a</sub> | < 0.001  | −0.33    |

Note. WFC = work-family conflict, FWC = Family-work conflict, a = Welch's *t*-test, *d* = Cohen's *d*.

**Table S3.** Relationship status differences in work-specific and well-being variables.

| Variable            | Coupled<br><i>n</i> = 581 |           | Single<br><i>n</i> = 155 |           | <i>t</i> (734)    | <i>p</i> | <i>d</i> |
|---------------------|---------------------------|-----------|--------------------------|-----------|-------------------|----------|----------|
|                     | <i>M</i>                  | <i>SD</i> | <i>M</i>                 | <i>SD</i> |                   |          |          |
| WFC                 | 27.12                     | 9.17      | 26.43                    | 8.34      | 0.85              | 0.396    | 0.08     |
| FWC                 | 24.48                     | 8.88      | 23.84                    | 8.73      | 0.80              | 0.425    | 0.07     |
| Remote work         | 35.36                     | 7.53      | 35.07                    | 7.09      | 0.34              | 0.735    | 0.04     |
| Time pressure actor | 27.87                     | 9.87      | 27.05                    | 9.22      | 0.93              | 0.355    | 0.08     |
| Life satisfaction   | 23.45                     | 6.03      | 20.77                    | 6.83      | 4.78              | < 0.001  | 0.43     |
| Physical health     | 5.43                      | 1.46      | 5.40                     | 1.67      | 0.22 <sub>a</sub> | 0.828    | 0.02     |
| Perceived stress    | 18.71                     | 7.12      | 19.44                    | 7.83      | −1.11             | 0.269    | −0.10    |
| Anxiety             | 7.73                      | 5.62      | 8.12                     | 5.62      | −0.76             | 0.445    | −0.07    |
| Depression          | 8.18                      | 6.55      | 9.10                     | 6.55      | −1.55             | 0.122    | −0.14    |

Note. WFC = work-family conflict, FWC = Family-work conflict, a = Welch's *t*-test, *d* = Cohen's *d*.

## SUPPLEMENTARY MATERIALS

**Table S4.** Parenthood differences in work-specific and well-being variables.

| Variable              | Parents<br><i>n</i> = 346 |           | Childless<br><i>n</i> = 130 |           | <i>t</i> (734)    | <i>p</i> | <i>d</i> |
|-----------------------|---------------------------|-----------|-----------------------------|-----------|-------------------|----------|----------|
|                       | <i>M</i>                  | <i>SD</i> | <i>M</i>                    | <i>SD</i> |                   |          |          |
| WFC                   | 27.21                     | 9.25      | 26.47                       | 8.44      | 1.07 <sub>a</sub> | 0.287    | 0.08     |
| FWC                   | 24.64                     | 9.06      | 23.70                       | 8.37      | 1.34              | 0.179    | 0.11     |
| Remote work           | 34.64                     | 7.44      | 37.06                       | 7.15      | −3.20             | 0.001    | −0.33    |
| Time pressure actor   | 26.93                     | 9.75      | 29.34                       | 9.53      | −3.15             | 0.002    | −0.25    |
| Time pressure partner | 20.55                     | 11.68     | 15.49                       | 15.43     | 4.46 <sub>a</sub> | < 0.001  | 0.37     |
| Life satisfaction     | 23.52                     | 6.16      | 21.54                       | 6.37      | 4.01              | < 0.001  | 0.32     |
| Physical health       | 5.53                      | 1.44      | 5.21                        | 1.61      | 2.56 <sub>a</sub> | 0.011    | 0.21     |
| Perceived stress      | 18.62                     | 7.13      | 19.39                       | 7.57      | −1.35             | 0.178    | −0.11    |
| Anxiety               | 7.67                      | 5.53      | 8.10                        | 5.81      | −0.97             | 0.335    | −0.08    |
| Depression            | 8.30                      | 6.64      | 8.54                        | 6.38      | −0.47             | 0.642    | −0.04    |

Note. WFC = work-family conflict, FWC = Family-work conflict, a = Welch's *t*-test, *d* = Cohen's *d*.

**Table S5.** Caregiving children under 12 differences in work-specific and well-being variables.

| Variable              | Without Children < 12<br><i>n</i> = 332 |           | With Children < 12<br><i>n</i> = 144 |           | <i>t</i> (734)     | <i>p</i> | <i>d</i> |
|-----------------------|-----------------------------------------|-----------|--------------------------------------|-----------|--------------------|----------|----------|
|                       | <i>M</i>                                | <i>SD</i> | <i>M</i>                             | <i>SD</i> |                    |          |          |
| WFC                   | 26.02                                   | 8.69      | 28.57                                | 9.31      | −3.75              | < 0.001  | −0.29    |
| FWC                   | 22.82                                   | 8.37      | 26.88                                | 9.04      | −6.19              | < 0.001  | −0.47    |
| Remote work           | 35.56                                   | 7.38      | 34.69                                | 7.54      | 1.18               | 0.238    | 0.12     |
| Time pressure actor   | 27.87                                   | 8.97      | 27.41                                | 10.92     | 0.59 <sub>a</sub>  | 0.559    | 0.05     |
| Time pressure partner | 17.22                                   | 13.64     | 21.82                                | 11.89     | −4.80 <sub>a</sub> | < 0.001  | −0.36    |
| Life satisfaction     | 22.73                                   | 6.15      | 23.16                                | 6.53      | −0.89              | 0.373    | −0.07    |
| Physical health       | 5.44                                    | 1.45      | 5.41                                 | 1.59      | 0.27               | 0.786    | 0.02     |
| Perceived stress      | 18.29                                   | 7.47      | 19.83                                | 6.86      | −2.79              | 0.005    | −0.21    |
| Anxiety               | 7.32                                    | 5.43      | 8.62                                 | 5.84      | −2.99 <sub>a</sub> | 0.003    | −0.23    |
| Depression            | 7.82                                    | 5.99      | 9.30                                 | 7.33      | −2.83 <sub>a</sub> | 0.005    | −0.22    |

Note. WFC = work-family conflict, FWC = Family-work conflict, a = Welch's *t*-test, *d* = Cohen's *d*.

**Table S6.** Remote work differences in work-specific and well-being variables.

| Variable              | Remote Work<br><i>n</i> = 530 |           | Stationary Work<br><i>n</i> = 206 |           | <i>t</i> (734) | <i>p</i> | <i>d</i> |
|-----------------------|-------------------------------|-----------|-----------------------------------|-----------|----------------|----------|----------|
|                       | <i>M</i>                      | <i>SD</i> | <i>M</i>                          | <i>SD</i> |                |          |          |
| WFC                   | 26.77                         | 8.97      | 27.49                             | 9.09      | −0.97          | 0.335    | −0.08    |
| FWC                   | 24.24                         | 8.85      | 24.62                             | 8.86      | −0.52          | 0.601    | −0.04    |
| Remote work           | 35.42                         | 7.32      | 34.83                             | 7.90      | 0.68           | 0.494    | 0.08     |
| Time pressure actor   | 28.36                         | 9.76      | 25.99                             | 9.49      | 2.98           | 0.003    | 0.24     |
| Time pressure partner | 19.62                         | 13.29     | 17.19                             | 12.81     | 2.25           | 0.025    | 0.19     |
| Life satisfaction     | 22.95                         | 6.23      | 22.74                             | 6.47      | 0.41           | 0.686    | 0.03     |
| Physical health       | 5.42                          | 1.47      | 5.45                              | 1.60      | −0.24          | 0.811    | −0.02    |
| Perceived stress      | 18.41                         | 7.29      | 20.03                             | 7.14      | −2.73          | 0.006    | −0.22    |
| Anxiety               | 7.56                          | 5.66      | 8.44                              | 5.48      | −1.91          | 0.057    | −0.16    |
| Depression            | 8.13                          | 6.46      | 9.02                              | 6.78      | −1.66          | 0.098    | −0.14    |

Note. WFC = work-family conflict, FWC = Family-work conflict, *d* = Cohen's *d*.

## SUPPLEMENTARY MATERIALS

**Table S7.** Mann-Whitney *U*-test for perceived self-multitasking by country.

| Multitasking          | Poland ( <i>n</i> = 392) |           | Ukraine ( <i>n</i> = 344) |           | <i>U</i> | <i>p</i> | Effect Size |
|-----------------------|--------------------------|-----------|---------------------------|-----------|----------|----------|-------------|
|                       | <i>M</i>                 | <i>SD</i> | <i>M</i>                  | <i>SD</i> |          |          |             |
| Shopping              | 1.72                     | 1.05      | 1.52                      | 0.90      | 75577.00 | 0.002    | 0.12        |
| Cleaning              | 2.13                     | 1.22      | 1.80                      | 1.00      | 77116.50 | < 0.001  | 0.14        |
| Cooking               | 2.34                     | 1.39      | 2.32                      | 1.16      | 65886.50 | 0.580    | −0.02       |
| Childcare             | 1.94                     | 2.07      | 1.64                      | 1.84      | 71791.50 | 0.109    | 0.07        |
| Elderly/disabled care | 0.63                     | 1.13      | 0.45                      | 1.00      | 73132.50 | 0.013    | 0.09        |
| Repairs, renovations  | 0.85                     | 1.25      | 0.40                      | 0.85      | 82213.00 | < 0.001  | 0.22        |
| Social meetings       | 1.13                     | 1.58      | 1.24                      | 1.25      | 58136.50 | < 0.001  | −0.14       |
| Entertainment         | 1.46                     | 1.54      | 0.53                      | 1.06      | 93984.50 | < 0.001  | 0.39        |
| Hobbies               | 1.68                     | 1.49      | 1.45                      | 1.39      | 73324.50 | 0.035    | 0.09        |
| Development           | 1.29                     | 1.32      | 1.76                      | 1.32      | 52032.00 | < 0.001  | −0.23       |
| Relax, rest           | 2.02                     | 1.50      | 2.13                      | 1.52      | 64238.50 | 0.256    | −0.05       |
| Sleep                 | 4.06                     | 1.65      | 4.29                      | 1.43      | 63023.00 | 0.050    | −0.07       |
| Stationary work       | 2.80                     | 2.28      | 2.35                      | 2.01      | 74743.50 | 0.008    | 0.11        |
| Remote work           | 2.35                     | 2.30      | 3.59                      | 1.55      | 48086.00 | < 0.001  | −0.29       |
| Learning, training    | 1.86                     | 1.82      | 1.59                      | 1.51      | 71253.50 | 0.171    | 0.06        |

Note. Effect size was assessed by rank biserial correlation.

**Table S8.** Mann-Whitney *U*-test for perceived self-multitasking by gender.

| Multitasking          | Men ( <i>n</i> = 250) |           | Women ( <i>n</i> = 486) |           | <i>U</i> | <i>p</i> | Effect Size |
|-----------------------|-----------------------|-----------|-------------------------|-----------|----------|----------|-------------|
|                       | <i>M</i>              | <i>SD</i> | <i>M</i>                | <i>SD</i> |          |          |             |
| Shopping              | 1.60                  | 0.94      | 1.64                    | 1.01      | 61165.00 | 0.869    | 0.01        |
| Cleaning              | 1.68                  | 1.02      | 2.13                    | 1.16      | 47323.00 | < 0.001  | −0.22       |
| Cooking               | 1.84                  | 1.24      | 2.58                    | 1.23      | 40096.00 | < 0.001  | −0.34       |
| Childcare             | 1.30                  | 1.76      | 2.06                    | 2.02      | 48095.00 | < 0.001  | −0.21       |
| Elderly/disabled care | 0.41                  | 0.82      | 0.61                    | 1.18      | 57530.00 | 0.139    | −0.05       |
| Repairs, renovations  | 1.14                  | 1.27      | 0.38                    | 0.91      | 87135.50 | < 0.001  | 0.43        |
| Social meetings       | 1.42                  | 1.54      | 1.05                    | 1.36      | 69744.50 | < 0.001  | 0.15        |
| Entertainment         | 1.54                  | 1.63      | 0.76                    | 1.21      | 78333.00 | < 0.001  | 0.29        |
| Hobbies               | 1.90                  | 1.58      | 1.40                    | 1.34      | 71342.50 | < 0.001  | 0.17        |
| Development           | 1.58                  | 1.33      | 1.47                    | 1.35      | 64242.00 | 0.186    | 0.06        |
| Relax, rest           | 2.42                  | 1.58      | 1.89                    | 1.45      | 71868.50 | < 0.001  | 0.18        |
| Sleep                 | 4.25                  | 1.46      | 4.13                    | 1.60      | 62434.50 | 0.430    | 0.03        |
| Stationary work       | 2.91                  | 2.17      | 2.43                    | 2.15      | 69040.50 | 0.002    | 0.14        |
| Remote work           | 2.41                  | 2.17      | 3.20                    | 1.98      | 48738.50 | < 0.001  | −0.20       |
| Learning, training    | 2.12                  | 1.86      | 1.53                    | 1.56      | 71267.00 | < 0.001  | 0.17        |

Note. Effect size was assessed by rank biserial correlation.

## SUPPLEMENTARY MATERIALS

**Table S9.** Mann-Whitney *U*-test for perceived self-multitasking by relationship status.

| Multitasking          | Coupled ( <i>n</i> = 581) |           | Single ( <i>n</i> = 155) |           | <i>U</i> | <i>p</i> | Effect Size |
|-----------------------|---------------------------|-----------|--------------------------|-----------|----------|----------|-------------|
|                       | <i>M</i>                  | <i>SD</i> | <i>M</i>                 | <i>SD</i> |          |          |             |
| Shopping              | 1.60                      | 0.97      | 1.71                     | 1.04      | 43183.00 | 0.396    | −0.04       |
| Cleaning              | 1.99                      | 1.16      | 1.94                     | 1.03      | 45681.50 | 0.771    | 0.02        |
| Cooking               | 2.37                      | 1.33      | 2.17                     | 1.10      | 48264.00 | 0.154    | 0.07        |
| Childcare             | 2.09                      | 1.99      | 0.70                     | 1.42      | 63078.50 | < 0.001  | 0.40        |
| Elderly/disabled care | 0.54                      | 1.04      | 0.58                     | 1.21      | 45781.50 | 0.687    | 0.02        |
| Repairs, renovations  | 0.67                      | 1.15      | 0.50                     | 0.91      | 47282.00 | 0.263    | 0.05        |
| Social meetings       | 1.09                      | 1.39      | 1.51                     | 1.56      | 37514.00 | < 0.001  | −0.17       |
| Entertainment         | 1.02                      | 1.42      | 1.04                     | 1.39      | 44414.00 | 0.776    | −0.01       |
| Hobbies               | 1.53                      | 1.47      | 1.72                     | 1.34      | 40124.00 | 0.032    | −0.11       |
| Development           | 1.46                      | 1.36      | 1.68                     | 1.24      | 39390.00 | 0.013    | −0.13       |
| Relax, rest           | 2.03                      | 1.51      | 2.24                     | 1.50      | 41309.00 | 0.104    | −0.08       |
| Sleep                 | 4.16                      | 1.59      | 4.20                     | 1.43      | 45843.00 | 0.657    | 0.02        |
| Stationary work       | 2.57                      | 2.16      | 2.68                     | 2.17      | 44020.50 | 0.655    | −0.02       |
| Remote work           | 3.04                      | 2.06      | 2.52                     | 2.11      | 51242.00 | 0.006    | 0.14        |
| Learning, training    | 1.70                      | 1.69      | 1.86                     | 1.67      | 42048.50 | 0.193    | −0.07       |

Note. Effect size was assessed by rank biserial correlation.

**Table S10.** Mann-Whitney *U*-test for perceived self-multitasking by parenthood.

| Multitasking          | Parents<br>( <i>n</i> = 502) |           | Childless<br>( <i>n</i> = 234) |           | <i>U</i>  | <i>p</i> | Effect Size |
|-----------------------|------------------------------|-----------|--------------------------------|-----------|-----------|----------|-------------|
|                       | <i>M</i>                     | <i>SD</i> | <i>M</i>                       | <i>SD</i> |           |          |             |
| Shopping              | 1.58                         | 0.96      | 1.73                           | 1.02      | 53471.00  | 0.034    | −0.09       |
| Cleaning              | 1.94                         | 1.12      | 2.06                           | 1.15      | 54854.50  | 0.130    | −0.07       |
| Cooking               | 2.30                         | 1.25      | 2.40                           | 1.35      | 56417.50  | 0.372    | −0.04       |
| Childcare             | 2.59                         | 1.89      | 0.12                           | 0.59      | 102066.50 | < 0.001  | 0.74        |
| Elderly/disabled care | 0.58                         | 1.06      | 0.48                           | 1.11      | 64210.50  | 0.010    | 0.09        |
| Repairs, renovations  | 0.55                         | 0.99      | 0.83                           | 1.31      | 53392.50  | 0.020    | −0.09       |
| Social meetings       | 0.95                         | 1.24      | 1.66                           | 1.69      | 44908.50  | < 0.001  | −0.24       |
| Entertainment         | 0.76                         | 1.20      | 1.60                           | 1.65      | 40967.00  | < 0.001  | −0.30       |
| Hobbies               | 1.35                         | 1.38      | 2.04                           | 1.49      | 42178.00  | < 0.001  | −0.28       |
| Development           | 1.43                         | 1.30      | 1.68                           | 1.41      | 53034.50  | 0.028    | −0.10       |
| Relax, rest           | 1.83                         | 1.42      | 2.59                           | 1.57      | 42618.00  | < 0.001  | −0.27       |
| Sleep                 | 4.07                         | 1.66      | 4.40                           | 1.29      | 53860.50  | 0.020    | −0.08       |
| Stationary work       | 2.41                         | 2.12      | 2.98                           | 2.22      | 49672.50  | < 0.001  | −0.15       |
| Remote work           | 3.11                         | 1.99      | 2.55                           | 2.21      | 66354.50  | 0.003    | 0.13        |
| Learning, training    | 1.49                         | 1.59      | 2.24                           | 1.77      | 44294.00  | < 0.001  | −0.25       |

Note. Effect size was assessed by rank biserial correlation.

## SUPPLEMENTARY MATERIALS

**Table S11.** Mann-Whitney *U*-test for perceived self-multitasking by caregiving children under 12.

| Multitasking          | No Child below 12<br>( <i>n</i> = 460) |           | Child below 12<br>( <i>n</i> = 276) |           | <i>U</i> | <i>p</i> | Effect Size |
|-----------------------|----------------------------------------|-----------|-------------------------------------|-----------|----------|----------|-------------|
|                       | <i>M</i>                               | <i>SD</i> | <i>M</i>                            | <i>SD</i> |          |          |             |
| Shopping              | 1.57                                   | 0.93      | 1.72                                | 1.07      | 59066.00 | 0.087    | −0.07       |
| Cleaning              | 1.91                                   | 1.07      | 2.09                                | 1.22      | 59067.00 | 0.098    | −0.07       |
| Cooking               | 2.31                                   | 1.24      | 2.36                                | 1.35      | 62000.00 | 0.583    | −0.02       |
| Childcare             | 0.65                                   | 1.23      | 3.71                                | 1.41      | 9669.00  | < 0.001  | −0.85       |
| Elderly/disabled care | 0.53                                   | 1.13      | 0.57                                | 0.97      | 58917.50 | 0.040    | −0.07       |
| Repairs, renovations  | 0.64                                   | 1.12      | 0.63                                | 1.09      | 62614.50 | 0.717    | −0.01       |
| Social meetings       | 1.33                                   | 1.48      | 0.92                                | 1.33      | 74659.00 | < 0.001  | 0.18        |
| Entertainment         | 1.12                                   | 1.48      | 0.86                                | 1.28      | 68377.50 | 0.055    | 0.08        |
| Hobbies               | 1.75                                   | 1.43      | 1.27                                | 1.42      | 77759.00 | < 0.001  | 0.23        |
| Development           | 1.71                                   | 1.37      | 1.17                                | 1.22      | 79149.50 | < 0.001  | 0.25        |
| Relax, rest           | 2.32                                   | 1.50      | 1.66                                | 1.44      | 80389.00 | < 0.001  | 0.27        |
| Sleep                 | 4.33                                   | 1.35      | 3.91                                | 1.82      | 69459.00 | 0.006    | 0.09        |
| Stationary work       | 2.70                                   | 2.14      | 2.40                                | 2.20      | 68668.50 | 0.052    | 0.08        |
| Remote work           | 3.04                                   | 2.04      | 2.75                                | 2.14      | 67940.00 | 0.096    | 0.07        |
| Learning, training    | 1.93                                   | 1.69      | 1.41                                | 1.63      | 75659.00 | < 0.001  | 0.19        |

Note. Effect size was assessed by rank biserial correlation.

**Table S12.** Mann-Whitney *U*-test for perceived self-multitasking by type of work.

| Multitasking          | Remote<br>( <i>n</i> = 530) |           | Stationary<br>( <i>n</i> = 206) |           | <i>U</i> | <i>p</i> | Effect Size |
|-----------------------|-----------------------------|-----------|---------------------------------|-----------|----------|----------|-------------|
|                       | <i>M</i>                    | <i>SD</i> | <i>M</i>                        | <i>SD</i> |          |          |             |
| Shopping              | 1.60                        | 0.92      | 1.68                            | 1.12      | 53245.50 | 0.574    | −0.03       |
| Cleaning              | 1.96                        | 1.10      | 2.02                            | 1.21      | 53393.50 | 0.629    | −0.02       |
| Cooking               | 2.38                        | 1.28      | 2.20                            | 1.29      | 58420.00 | 0.126    | 0.07        |
| Childcare             | 1.62                        | 1.93      | 2.26                            | 2.01      | 44865.00 | < 0.001  | −0.18       |
| Elderly/disabled care | 0.52                        | 1.04      | 0.62                            | 1.17      | 53132.50 | 0.480    | −0.03       |
| Repairs, renovations  | 0.71                        | 1.20      | 0.45                            | 0.77      | 58594.00 | 0.071    | 0.07        |
| Social meetings       | 1.21                        | 1.41      | 1.10                            | 1.50      | 58934.50 | 0.076    | 0.08        |
| Entertainment         | 1.03                        | 1.44      | 1.01                            | 1.35      | 53958.00 | 0.790    | −0.01       |
| Hobbies               | 1.62                        | 1.45      | 1.46                            | 1.45      | 58377.00 | 0.132    | 0.07        |
| Development           | 1.61                        | 1.35      | 1.23                            | 1.27      | 64246.00 | < 0.001  | 0.18        |
| Relax, rest           | 2.13                        | 1.55      | 1.94                            | 1.39      | 57751.00 | 0.210    | 0.06        |
| Sleep                 | 4.20                        | 1.53      | 4.11                            | 1.62      | 56465.00 | 0.354    | 0.03        |
| Stationary work       | 2.26                        | 2.10      | 3.43                            | 2.10      | 38293.00 | < 0.001  | −0.30       |
| Remote work           | 3.55                        | 1.83      | 1.35                            | 1.83      | 86398.00 | < 0.001  | 0.58        |
| Learning, training    | 1.97                        | 1.73      | 1.13                            | 1.41      | 69963.50 | < 0.001  | 0.28        |

Note. Effect size was assessed by rank biserial correlation.

## SUPPLEMENTARY MATERIALS

**Table S13.** Kruskal-Wallis *T*-test for differences between assessment of actor and partner multitasking.

| Multitasking          | Actor<br>( <i>n</i> = 581) |           | Partner<br>( <i>n</i> = 575) |           | <i>T</i> | <i>Z</i> | <i>p</i> | Effect<br>Size |
|-----------------------|----------------------------|-----------|------------------------------|-----------|----------|----------|----------|----------------|
|                       | <i>M</i>                   | <i>SD</i> | <i>M</i>                     | <i>SD</i> |          |          |          |                |
| Shopping              | 1.60                       | 0.97      | 1.63                         | 1.13      | 27289.50 | 0.57     | 0.568    | 0.02           |
| Cleaning              | 1.99                       | 1.16      | 1.52                         | 1.27      | 24587.00 | 7.07     | < 0.001  | 0.29           |
| Cooking               | 2.37                       | 1.33      | 1.57                         | 1.36      | 25903.00 | 9.65     | < 0.001  | 0.40           |
| Childcare             | 2.09                       | 1.99      | 1.54                         | 1.72      | 6675.00  | 8.59     | < 0.001  | 0.36           |
| Elderly/disabled care | 0.54                       | 1.04      | 0.49                         | 1.02      | 6386.50  | 1.37     | 0.170    | 0.06           |
| Repairs, renovations  | 0.67                       | 1.15      | 0.74                         | 1.17      | 18470.50 | 1.75     | 0.081    | 0.07           |
| Social meetings       | 1.09                       | 1.39      | 1.06                         | 1.39      | 11982.00 | 0.30     | 0.766    | 0.01           |
| Entertainment         | 1.02                       | 1.42      | 0.99                         | 1.39      | 8185.00  | 0.81     | 0.415    | 0.03           |
| Hobbies               | 1.53                       | 1.47      | 1.36                         | 1.38      | 20952.50 | 2.60     | 0.009    | 0.11           |
| Development           | 1.46                       | 1.36      | 1.24                         | 1.30      | 11996.00 | 4.34     | < 0.001  | 0.18           |
| Relax, rest           | 2.03                       | 1.51      | 2.22                         | 1.55      | 14133.50 | 3.75     | < 0.001  | 0.16           |
| Sleep                 | 4.16                       | 1.59      | 4.07                         | 1.64      | 2839.00  | 1.67     | 0.096    | 0.07           |
| Stationary work       | 2.56                       | 2.16      | 2.73                         | 2.26      | 27486.00 | 1.18     | 0.237    | 0.05           |
| Remote work           | 3.04                       | 2.06      | 1.67                         | 2.07      | 10713.00 | 11.07    | < 0.001  | 0.46           |
| Learning, training    | 1.70                       | 1.69      | 0.91                         | 1.41      | 9480.00  | 9.98     | < 0.001  | 0.42           |

Note. Effect size was assessed by dividing the absolute standardized test statistic *Z* by the square root of the number of compared pairs.
